---

# Salt Added to Food and Body Mass Index: A Bidirectional Mendelian Randomization Study

Long Zhou<sup>1</sup>, Xiaoxiao Wen<sup>2</sup>, Liancheng Zhao<sup>2</sup>, Yan Yu<sup>1</sup>

## Affiliations

1 School of Public Health, Xi'an Jiaotong University Health Science Center, Xi'an, China.

2 Division of Prevention and Community Health, National Center for Cardiovascular Disease, Fuwai Hospital, Chinese Academy of Medical Sciences and Peking Union Medical College, Beijing, China.

**Correspondence to** Prof. Yan Yu, School of Public Health, Xi'an Jiaotong University Health Science Center, 76# West Yanta Road, Xi'an, 710061, China.  
Email: [yanyupaper@yeah.net](mailto:yanyupaper@yeah.net)

**All authors have approved the manuscript and none of the authors had any conflicts of interest to declare.**

---

## Abstract

**Background and objective:** Observational studies suggest that dietary sodium (salt) intake may be associated with body mass index (BMI). However, these findings may be biased by confounding and reverse causality. The present study aimed to apply a bidirectional Mendelian Randomization (MR) framework to determine the causal association between salt added to food (do not include salt used in cooking) and BMI by integrating summary-level genome-wide association study (GWAS) data.

**Methods:** We performed two-sample MR analyses using summary statistics of GWAS. Inverse-variance weighted (IVW) method was used to analyze the effect of the preference of salt added to food on BMI. We used maximum likelihood estimation and random effect model as auxiliary verification. A bidirectional MR analysis with BMI as the exposure and salt added to food as the outcome was also performed.

**Results:** We identified 74 single nucleotide polymorphisms (SNPs) that were genome-wide significant ( $P < 5 \times 10^{-8}$ ) for the preference of salt added to food in the UK Biobank ( $n = 462,630$ ) and were investigated for their association with BMI in a meta-analysis of 322,154 European-descent individuals from GWAS and MetaboChip studies. The IVW method estimate indicated that the preference of salt added to food was positively associated with BMI ( $\beta = 0.1416$ ,  $SE = 0.0576$ ,  $P = 0.0139$ ). Results from maximum likelihood

---

estimation ( $\beta = 0.1476$ ,  $SE = 0.0363$ ,  $P < 0.0001$ ) and the random effect model ( $\beta = 0.1411$ ,  $SE = 0.0572$ ,  $P = 0.0137$ ) were consistent with the IVW. Bidirectional MR analyses suggested that BMI was not associated with the preference of salt added to food.

**Conclusion:** Our results provided qualitative evidence supporting a causal relationship between salt intake and BMI.

**Keywords:** Salt added to food, Salt intake, Body mass index, Mendelian randomization

---

## Introduction

High sodium (salt) intake is one of the leading risk factors for disease burden across the world (1). Excess sodium intake has been identified as a major risk factor for high blood pressure (BP) (2,3) and thus leading to a higher risk of cardiovascular disease (CVD) (4,5). It was generally accepted that the relationship between high sodium intake and CVD was mediated by elevated BP or hypertension because high BP or hypertension is a well-established risk factor for CVD, including stroke and coronary heart disease (6,7). In addition to elevating BP, whether high sodium intake can increase the risk of CVD through other ways is a worthwhile scientific issue. In the past few years, several epidemiological studies have found that dietary sodium intake may be positively associated with body mass index (BMI) as well as the odds of overweight or obesity (8-10). The International Study of Macro-/Micro-nutrients and Blood Pressure (INTERMAP Study) showed that dietary salt intake 1 g/d higher was significantly associated with BMI higher by 0.28 in Japan, 0.10 in China, 0.42 in the United Kingdom, and 0.52 in the United States after adjustment for physical activity and energy intake (10). These findings suggest that overweight/obesity may also serve as a mediator between high sodium intake and the risk of CVD because overweight/obesity is also a well-known risk factor for CVD (1,11,12). To date, studies on the relationship between dietary sodium intake and BMI, as well as overweight/obesity, were almost cross-sectional designs, which unable to give a causal relationship. In the

---

absence of high-quality randomized clinical trial (RCT) data, the mendelian randomization (MR) can be applied to strengthen or refute the causality of biomarkers in disease etiology (13). We applied a two-sample MR framework to determine the causal association between the preference of salt added to food (do not include salt used in cooking) and BMI by integrating summary-level genome-wide association study (GWAS) data.

## **Methods**

### **Data sources and single nucleotide polymorphism (SNP) selection**

Effect estimates for SNPs associated with the preference of salt added to food were obtained from UK Biobank, which is the largest GWAS in 462,630 European-ancestry individuals. Food preferences are the main reason for choosing to eat what we do. Understanding the biological and environmental factors influence food preferences and how they are related to food intake and health outcomes may help to improve both dietary guidelines and interventions to help people embrace a healthier lifestyle. UK Biobank provides a unique opportunity to understand food preferences better. Salt added to food in UK Biobank includes 4 levels: Never/rarely, Sometimes, Usually, and Always. Previous studies have shown that the preference of adding salt to cooked food could reflect the relative level of salt intake to a certain extent (14-16). We selected SNPs associated with the preference for salt added to food at a genome-wide significant level ( $P < 5 \times 10^{-8}$ ). Effect estimates of these

salt-associated SNPs on the BMI levels were assessed using the summary statistics from a meta-analysis of 322,154 European-descent individuals from GWAS and Metabochip studies (17). All GWASs have existing ethical permissions from their respective institutional review boards and include participant informed consent.

## **SNP validation**

One requirement of MR is that the selected SNPs must not be in Linkage disequilibrium (LD) with each other, since if a selected SNP is highly correlated with other risk factor loci, this may result in confounding (13). In our analysis, SNPs were removed if their measured LD had an  $r^2$  greater than 0.001. We retained the SNP most strongly associated with the preference of salt added to food by p-value.

The SNPs selected for MR analysis cannot be directly related to the outcome. In order to meet this requirement, we removed those SNPs that are directly related ( $P < 5 \times 10^{-8}$ , a conventional threshold for declaring statistical significance in GWAS) to BMI.

An essential assumption of MR is that each SNP must only influence the risk of the outcome through the exposure, as the inclusion of SNPs that contribute through a pleiotropic pathway could bias estimates. We used MR-Egger regression to assess for the presence of pleiotropy (18). Besides, to ensure that there is no correlation between SNPs and confounding factors, we

searched these selected SNPs in the PubMed database. Those SNPs related to possible confounding factors were removed from MR analysis.

## Statistical analysis

The summary-level GWAS data for the exposure and outcome were computed from two independent studies with individual-level SNP genotypes. We harmonized the summary data for salt added to food and BMI so that the effect estimates of SNPs on exposure and outcome were shown for the same alleles. We mainly used the inverse-variance weighted (IVW) method to estimate the effect of the preference of salt added to food on BMI (19,20). To improve the reliability of the results, we also used maximum likelihood estimation and random effect model as auxiliary verification. To ensure that the inclusion of SNPs did not introduce random error into our results, we conducted sensitivity analyses using the leave-one-out method. In addition, we performed a bidirectional MR analysis with BMI as the exposure and salt added to food as the outcome to explore whether BMI influences the preference of salt added to food. All analyses were performed using R version 3.6.3 (R Foundation for Statistical Computing, Vienna, Austria).

## Results

After screening and validation, we identified 74 SNPs that were significantly associated with the preference of salt added to food ( $P < 5 \times 10^{-8}$ ) and independent of BMI ( $P > 5 \times 10^{-8}$ ). The characteristics of the selected SNPs are

presented in **Table 1**.

We used MR-Egger regression to assess for the presence of pleiotropy, and the result showed that the intercept term was centered at the origin with a confidence interval including the null ( $\beta_0=0.0014$ , 95% CI -0.0041, 0.0069,  $P = 0.6121$ ), suggesting that pleiotropy had not unduly influenced the results.

The regression lines obtained from IVW, maximum likelihood estimation, and the random effect model were basically in coincidence, which suggests that the results would not be influenced by different analytic methods (**Figure 1**). In addition, we inspected the funnel plot for any asymmetry, which would be suggestive of pleiotropy, and found the plot to be symmetrical (**Figure 2**).

The IVW method estimate indicated that the preference of salt added to food was positively associated with BMI ( $\beta = 0.1416$ , SE = 0.0576,  $P = 0.0139$ ). Results from maximum likelihood estimation ( $\beta = 0.1476$ , SE = 0.0363,  $P < 0.0001$ ) and the random effect model ( $\beta = 0.1411$ , SE = 0.0572,  $P = 0.0137$ ) were consistent with the IVW. The forest plot of each SNP estimates and pooled results using different methods are presented in **Figure 3**. MR leave-one-out sensitivity analysis showed that the pooled effect of the preference of salt added to food on BMI was significant ( $\beta = 0.1416$ , SE = 0.0576,  $P = 0.0139$ ), which suggests a robust relationship between the preference of salt added to food and BMI (**Figure 4**).

To further clarify the causal relationship between the preference of salt added



---

to food and BMI and exclude the possible impact of a reverse causal relationship, we further performed a bidirectional MR analysis with BMI as the exposure and the preference of salt added to food as the outcome. We identified 67 SNPs that were significantly associated with BMI ( $P < 5 \times 10^{-8}$ ) and independent of the preference of salt added to food ( $P > 5 \times 10^{-8}$ ). There was no significant pleiotropy ( $\beta_0 = 0.0008$ , 95% CI -0.0022, 0.0038,  $P = 0.5909$ ). MR analyses showed that BMI was not associated with the preference of salt added to food (**Figure 5**).

## Discussion

Using a bidirectional MR study design, based on the largest GWAS summary statistics available on the preference of salt added to food and BMI, our analyses showed a positive association between the preference of salt added to food and BMI, and this relationship was causal. These findings have important public health implications in that reducing salt intake, in addition to lowering BP, may also lower BMI, and thereby reduce the risk of CVD.

The prevalence of obesity has increased dramatically worldwide over the last decades (12). A systematic estimation showed that 57.8% of the world population would be overweight or obese by the year 2030 if the current trends continue (21). Numerous studies have demonstrated that obesity is an important risk factor for CVD. The Manitoba Study prospectively investigated 3,983 men for 26 years and found that a high BMI was significantly associated

---

with the development of myocardial infarction (MI), sudden death and coronary insufficiency, or suspected MI (22). The Framingham Heart Study showed that overweight/obesity ( $\text{BMI} \geq 25 \text{ kg/m}^2$ ) was associated with a 23% higher risk of coronary heart disease for men and 15% for women (23). The Global Burden of Metabolic Risk Factors for Chronic Disease Collaboration conducted a meta-analysis on 97 cohort studies, with 1.8 million participants reported significant BMI effects on the development of CHD and stroke. The Hazard Ratio for each  $5 \text{ kg/m}^2$  higher BMI was 1.27 (95% CI 1.23-1.31) for coronary heart disease and 1.18 (1.14-1.22) for stroke after adjustment for confounders (24).

In the last few years, several studies have linked dietary salt intake with BMI in the general population. Although some of those previous studies had methodological problems, namely the use of either spot urine (25) or dietary recall methods (26,27) to estimate individual salt intake, which has been criticized for large bias in estimating individual salt intake (28,29), most of the studies reported a positive association between dietary salt intake and BMI (8-10,26,27,30-33). The INTERMAP Study is the largest international multicenter study on the relationship between salt intake and BMI to date. It used 2 timed 24-h urine collections to estimate salt intake and 4 in-depth multipass 24-h dietary recalls for estimating daily energy intake. After adjustment for several potential confounding factors including daily total energy intake and physical activity, salt intake 1 g/d higher was associated with

---

BMI 0.28 (95% CI, 0.23, 0.34) higher in Japan, 0.10 (95% CI, 0.05, 0.14) higher in China, 0.42 (95% CI, 0.27, 0.56) higher in the United Kingdom, and 0.52 (95% CI, 0.45, 0.59) higher in the United States (10). However, almost all these studies were cross-sectional design, which cannot avoid inherent limitations such as unknown confounding factors and reverse causal association. In the present study, a bidirectional MR study was applied to identify the causal association between the preference of salt added to food and BMI. Results from the IVW method, maximum likelihood estimation, and the random effect model support that the genetically predicted the preference of salt added to food was positively and casually associated with BMI, which was consistent with the previous observational studies.

Our present study had several limitations. First, we used the preference of salt added to food as the primary exposure rather than the gold standard for estimating daily salt intake because there is no GWAS study of 24-hour urinary sodium so far. Nevertheless, the preference of adding salt to cooked food could reflect the relative level of long-term salt intake to a certain extent and is better than using a spot urine sample to estimate 24-hour sodium excretion. Second, the preference of salt added to food was based on self-reported answers in the UK Biobank, and different people could differently interpret the question. Third, it is impossible to quantitatively evaluate the relationship between salt intake and BMI when using the preference of salt added to food as the exposure.

---

In conclusion, our analysis provided qualitative evidence supporting a causal relationship between salt intake and BMI. Further studies using genetic variants of 24-hour urinary sodium excretion as exposure are needed to validate this finding.

**Conflict of interest:** None

**Funding:** None

---

## References

1. Global, regional, and national comparative risk assessment of 79 behavioural, environmental and occupational, and metabolic risks or clusters of risks, 1990-2015: a systematic analysis for the Global Burden of Disease Study 2015. *Lancet* 2016;388:1659-1724.
2. Sacks FM, Svetkey LP, Vollmer WM, et al. Effects on blood pressure of reduced dietary sodium and the Dietary Approaches to Stop Hypertension (DASH) diet. DASH-Sodium Collaborative Research Group. *N Engl J Med* 2001;344:3-10.
3. He FJ, Li J, Macgregor GA. Effect of longer term modest salt reduction on blood pressure: Cochrane systematic review and meta-analysis of randomised trials. *BMJ* 2013;346:f1325.
4. Aburto NJ, Ziolkovska A, Hooper L, Elliott P, Cappuccio FP, Meerpohl JJ. Effect of lower sodium intake on health: systematic review and meta-analyses. *BMJ* 2013;346:f1326.
5. Strazzullo P, D'Elia L, Kandala NB, Cappuccio FP. Salt intake, stroke, and cardiovascular disease: meta-analysis of prospective studies. *BMJ* 2009;339:b4567.
6. Kannel WB. Blood pressure as a cardiovascular risk factor: prevention and treatment. *JAMA* 1996;275:1571-6.
7. Lawes CM, Vander HS, Rodgers A. Global burden of blood-pressure-related disease, 2001. *Lancet* 2008;371:1513-8.

8. Ma Y, He FJ, MacGregor GA. High salt intake: independent risk factor for obesity? Hypertension 2015;66:843-9.
9. Zhao L, Cogswell ME, Yang Q, et al. Association of usual 24-h sodium excretion with measures of adiposity among adults in the United States: NHANES, 2014. Am J Clin Nutr 2019;109:139-147.
10. Zhou L, Stamler J, Chan Q, et al. Salt intake and prevalence of overweight/obesity in Japan, China, the United Kingdom, and the United States: the INTERMAP Study. Am J Clin Nutr 2019;110:34-40.
11. Afshin A, Forouzanfar MH, Reitsma MB, et al. Health Effects of Overweight and Obesity in 195 Countries over 25 Years. N Engl J Med 2017;377:13-27.
12. Chooi YC, Ding C, Magkos F. The epidemiology of obesity. Metabolism 2019;92:6-10.
13. Lawlor DA, Harbord RM, Sterne JA, Timpson N, Davey SG. Mendelian randomization: using genes as instruments for making causal inferences in epidemiology. Stat Med 2008;27:1133-63.
14. Nowson C, Lim K, Grimes C, et al. Dietary Salt Intake and Discretionary Salt Use in Two General Population Samples in Australia: 2011 and 2014. Nutrients 2015;7:10501-12.
15. Quader ZS, Zhao L, Harnack LJ, et al. Self-Reported Measures of Discretionary Salt Use Accurately Estimated Sodium Intake Overall but not in Certain Subgroups of US Adults from 3 Geographic Regions in the Salt Sources Study. J Nutr 2019;149:1623-1632.

- 
16. Bhat S, Marklund M, Henry ME, et al. A Systematic Review of the Sources of Dietary Salt Around the World. *Adv Nutr* 2020;11:677-686.
  17. Locke AE, Kahali B, Berndt SI, et al. Genetic studies of body mass index yield new insights for obesity biology. *Nature* 2015;518:197-206.
  18. Bowden J, Davey SG, Burgess S. Mendelian randomization with invalid instruments: effect estimation and bias detection through Egger regression. *Int J Epidemiol* 2015;44:512-25.
  19. Ehret GB, Munroe PB, Rice KM, et al. Genetic variants in novel pathways influence blood pressure and cardiovascular disease risk. *Nature* 2011;478:103-9.
  20. Bowden J, Davey SG, Haycock PC, Burgess S. Consistent Estimation in Mendelian Randomization with Some Invalid Instruments Using a Weighted Median Estimator. *Genet Epidemiol* 2016;40:304-14.
  21. Kelly T, Yang W, Chen CS, Reynolds K, He J. Global burden of obesity in 2005 and projections to 2030. *Int J Obes (Lond)* 2008;32:1431-7.
  22. Rabkin SW, Mathewson FA, Hsu PH. Relation of body weight to development of ischemic heart disease in a cohort of young North American men after a 26 year observation period: the Manitoba Study. *Am J Cardiol* 1977;39:452-8.
  23. Wilson PW, D'Agostino RB, Sullivan L, Parise H, Kannel WB. Overweight and obesity as determinants of cardiovascular risk: the Framingham experience. *Arch Intern Med* 2002;162:1867-72.

- 
24. Lu Y, Hajifathalian K, Ezzati M, Woodward M, Rimm EB, Danaei G. Metabolic mediators of the effects of body-mass index, overweight, and obesity on coronary heart disease and stroke: a pooled analysis of 97 prospective cohorts with 1.8 million participants. *Lancet* 2014;383:970-83.
  25. Oh SW, Koo HS, Han KH, Han SY, Chin HJ. Associations of sodium intake with obesity, metabolic disorder, and albuminuria according to age. *PLoS One* 2017;12:e0188770.
  26. Song HJ, Cho YG, Lee HJ. Dietary sodium intake and prevalence of overweight in adults. *Metabolism* 2013;62:703-8.
  27. Elfassy T, Mossavar-Rahmani Y, Van Horn L, et al. Associations of Sodium and Potassium with Obesity Measures Among Diverse US Hispanic/Latino Adults: Results from the Hispanic Community Health Study/Study of Latinos. *Obesity (Silver Spring)* 2018;26:442-450.
  28. Zhou L, Tian Y, Fu JJ, et al. Validation of spot urine in predicting 24-h sodium excretion at the individual level. *Am J Clin Nutr* 2017;105:1291-1296.
  29. Wen X, Zhou L, Stamler J, et al. Agreement between 24-h dietary recalls and 24-h urine collections for estimating sodium intake in China, Japan, UK, USA: the International Study of Macro- and Micro-nutrients and Blood Pressure. *J Hypertens* 2019;37:814-819.
  30. Yi SS, Kansagra SM. Associations of sodium intake with obesity, body mass index, waist circumference, and weight. *Am J Prev Med* 2014;46:e53-5.
  31. Murakami K, Livingstone MB, Sasaki S, Uenishi K. Ability of self-reported



---

estimates of dietary sodium, potassium and protein to detect an association with general and abdominal obesity: comparison with the estimates derived from 24 h urinary excretion. Br J Nutr 2015;113:1308-18.

32. Ge Z, Zhang J, Chen X, et al. Are 24 h urinary sodium excretion and sodium:potassium independently associated with obesity in Chinese adults? Public Health Nutr 2016;19:1074-80.

33. Nam GE, Kim SM, Choi MK, et al. Association between 24-h urinary sodium excretion and obesity in Korean adults: A multicenter study. Nutrition 2017;41:113-119.

**Table 1** Characteristics of the selected single-nucleotide polymorphisms associated with salt added to food and their associations with body mass index

| SNPs       | Salt added to food |        |          | BMI      |        |          |
|------------|--------------------|--------|----------|----------|--------|----------|
|            | $\beta$            | SE     | P        | $\beta$  | SE     | P        |
| rs1008078  | 0.0117             | 0.0018 | 1.10E-10 | 0.0076   | 0.0038 | 0.0455   |
| rs10140751 | -0.0113            | 0.0020 | 3.60E-08 | -0.0058  | 0.0044 | 0.1874   |
| rs1045411  | -0.0151            | 0.0020 | 4.00E-14 | -0.0127  | 0.0036 | 0.000455 |
| rs10736951 | -0.0114            | 0.0018 | 7.00E-10 | 0.0033   | 0.0043 | 0.4428   |
| rs10752999 | 0.0128             | 0.0019 | 3.50E-11 | 0.0046   | 0.0041 | 0.2619   |
| rs10883796 | 0.0114             | 0.0019 | 3.30E-09 | 0.015    | 0.0033 | 7.46E-06 |
| rs11075194 | -0.0098            | 0.0018 | 4.00E-08 | 0.0089   | 0.0038 | 0.01918  |
| rs11082431 | 0.0106             | 0.0019 | 3.80E-08 | 0.0073   | 0.0041 | 0.075    |
| rs11761254 | -0.0177            | 0.0025 | 3.80E-12 | -0.0025  | 0.0062 | 0.6868   |
| rs12094804 | 0.0205             | 0.0037 | 2.00E-08 | 0.0024   | 0.0094 | 0.7985   |
| rs12501838 | 0.0147             | 0.0021 | 1.80E-12 | 0.0056   | 0.0044 | 0.2031   |
| rs12563932 | -0.0285            | 0.0052 | 4.50E-08 | -0.002   | 0.0105 | 0.8489   |
| rs12658060 | -0.0274            | 0.0021 | 2.50E-38 | 2.00E-04 | 0.0046 | 0.9653   |
| rs12789951 | -0.0117            | 0.0018 | 7.00E-11 | 0.0055   | 0.004  | 0.1691   |
| rs12988960 | 0.0150             | 0.0019 | 2.80E-15 | 0.0056   | 0.004  | 0.1615   |
| rs13131880 | -0.0126            | 0.0021 | 3.00E-09 | -0.0048  | 0.0049 | 0.3273   |
| rs13400612 | 0.0203             | 0.0020 | 3.00E-23 | 0.002    | 0.0043 | 0.6418   |
| rs1728779  | 0.0099             | 0.0018 | 3.50E-08 | -0.0103  | 0.0042 | 0.01419  |
| rs17805497 | 0.0125             | 0.0019 | 1.50E-11 | 0.0041   | 0.004  | 0.3054   |
| rs1823011  | -0.0102            | 0.0019 | 3.90E-08 | -0.0067  | 0.0041 | 0.1022   |
| rs1895951  | -0.0117            | 0.0021 | 4.80E-08 | -0.0126  | 0.0044 | 0.004188 |
| rs2263636  | 0.0113             | 0.0020 | 1.00E-08 | -0.0118  | 0.007  | 0.09185  |
| rs2339234  | -0.0176            | 0.0019 | 1.60E-20 | 0.0148   | 0.0041 | 0.000307 |
| rs2457427  | -0.0166            | 0.0026 | 1.10E-10 | 0.0058   | 0.0057 | 0.3089   |
| rs2506738  | -0.0151            | 0.0018 | 5.00E-17 | -0.0071  | 0.0038 | 0.061701 |
| rs2521501  | -0.0114            | 0.0019 | 2.00E-09 | -0.0039  | 0.0036 | 0.2863   |
| rs2547040  | -0.0127            | 0.0022 | 1.20E-08 | 0.0102   | 0.0047 | 0.02999  |
| rs264932   | -0.0104            | 0.0018 | 7.30E-09 | -0.0101  | 0.0038 | 0.007863 |
| rs2693687  | 0.0116             | 0.0018 | 1.70E-10 | 0.0123   | 0.0045 | 0.006449 |
| rs2736748  | 0.0280             | 0.0022 | 1.80E-38 | -0.0067  | 0.0046 | 0.1452   |
| rs2835623  | 0.0227             | 0.0041 | 4.40E-08 | -0.0023  | 0.0084 | 0.7842   |
| rs2852348  | -0.0131            | 0.0018 | 1.60E-13 | -0.0013  | 0.0037 | 0.725301 |
| rs2899345  | 0.0099             | 0.0018 | 2.50E-08 | -0.0067  | 0.0038 | 0.07787  |
| rs33137    | -0.0121            | 0.0018 | 9.40E-12 | -0.0017  | 0.0038 | 0.6546   |
| rs34906832 | 0.0151             | 0.0025 | 2.40E-09 | 0.0098   | 0.0058 | 0.09109  |
| rs35142265 | 0.0150             | 0.0021 | 2.10E-12 | -0.0059  | 0.0049 | 0.2286   |
| rs3890316  | -0.0113            | 0.0020 | 2.80E-08 | -0.0029  | 0.0044 | 0.5098   |
| rs400750   | 0.0167             | 0.0018 | 3.30E-20 | 0.0082   | 0.0038 | 0.03094  |
| rs4236065  | -0.0112            | 0.0020 | 3.80E-08 | 0.0057   | 0.0052 | 0.273    |

|            |         |        |          |           |        |          |
|------------|---------|--------|----------|-----------|--------|----------|
| rs4595499  | -0.0173 | 0.0018 | 1.20E-21 | 0.0062    | 0.004  | 0.1211   |
| rs4739105  | 0.0155  | 0.0022 | 1.30E-12 | -1.00E-04 | 0.0048 | 0.9834   |
| rs4799949  | -0.0110 | 0.0019 | 4.50E-09 | -0.0045   | 0.004  | 0.2606   |
| rs4912891  | 0.0107  | 0.0019 | 3.00E-08 | -5.00E-04 | 0.0041 | 0.9029   |
| rs491907   | 0.0110  | 0.0018 | 4.60E-10 | -0.0021   | 0.0035 | 0.546799 |
| rs4948275  | 0.0127  | 0.0018 | 7.40E-13 | 0.0043    | 0.0078 | 0.5814   |
| rs4981196  | -0.0115 | 0.0018 | 3.30E-10 | 0.0039    | 0.0038 | 0.3047   |
| rs526210   | 0.0101  | 0.0018 | 2.80E-08 | -0.0042   | 0.004  | 0.2937   |
| rs528301   | 0.0153  | 0.0018 | 6.60E-18 | -0.0039   | 0.0038 | 0.3047   |
| rs55897719 | 0.0135  | 0.0019 | 1.10E-12 | 0.0034    | 0.0041 | 0.407    |
| rs586716   | 0.0144  | 0.0018 | 1.10E-15 | -0.0043   | 0.0031 | 0.1585   |
| rs62098445 | -0.0159 | 0.0019 | 1.00E-16 | -0.0069   | 0.0041 | 0.092389 |
| rs6416794  | -0.0120 | 0.0022 | 4.90E-08 | -0.0019   | 0.0056 | 0.734401 |
| rs6443950  | -0.0142 | 0.0018 | 8.50E-15 | -0.0087   | 0.004  | 0.02963  |
| rs6776248  | 0.0113  | 0.0020 | 1.40E-08 | -0.0042   | 0.0042 | 0.3173   |
| rs6780346  | -0.0168 | 0.0018 | 1.90E-20 | -0.0125   | 0.0038 | 0.001004 |
| rs6987313  | 0.0099  | 0.0018 | 2.00E-08 | 0.0034    | 0.0037 | 0.3581   |
| rs7110845  | -0.0115 | 0.0018 | 1.10E-10 | -0.0032   | 0.0041 | 0.4351   |
| rs72807804 | 0.0121  | 0.0021 | 1.70E-08 | -8.00E-04 | 0.0044 | 0.8557   |
| rs7581335  | 0.0149  | 0.0025 | 3.80E-09 | 0.0172    | 0.0054 | 0.001447 |
| rs7591518  | -0.0208 | 0.0019 | 5.10E-27 | -0.0095   | 0.0041 | 0.0205   |
| rs7670308  | -0.0116 | 0.0018 | 1.00E-10 | -4.00E-04 | 0.004  | 0.9203   |
| rs7673170  | -0.0126 | 0.0018 | 2.70E-12 | 0.001     | 0.0065 | 0.8777   |
| rs7927679  | 0.0150  | 0.0018 | 2.30E-17 | 0.002     | 0.0037 | 0.5888   |
| rs7982263  | 0.0106  | 0.0018 | 2.90E-09 | -4.00E-04 | 0.0038 | 0.9162   |
| rs8022455  | -0.0111 | 0.0018 | 3.40E-10 | 0.0067    | 0.0037 | 0.07017  |
| rs8040685  | -0.0154 | 0.0028 | 2.30E-08 | -0.002    | 0.0059 | 0.7346   |
| rs8097544  | 0.0140  | 0.0025 | 2.40E-08 | 0.018     | 0.0054 | 0.000858 |
| rs868720   | 0.0160  | 0.0019 | 9.60E-17 | -0.0093   | 0.0042 | 0.02681  |
| rs9317406  | -0.0107 | 0.0018 | 4.40E-09 | -0.0066   | 0.004  | 0.09894  |
| rs9569747  | -0.0126 | 0.0019 | 8.60E-11 | -0.0114   | 0.0042 | 0.006642 |
| rs961044   | -0.0140 | 0.0025 | 3.00E-08 | -0.0039   | 0.0054 | 0.4702   |
| rs9611875  | 0.0662  | 0.0045 | 1.30E-48 | 0.0143    | 0.0117 | 0.2216   |
| rs9667150  | 0.0126  | 0.0018 | 1.50E-12 | 0.0048    | 0.0037 | 0.1945   |
| rs9843358  | 0.0190  | 0.0023 | 6.20E-16 | 9.00E-04  | 0.0053 | 0.8652   |

**Figure 1** Scatter plot for the preference of salt added to food on BMI analysis

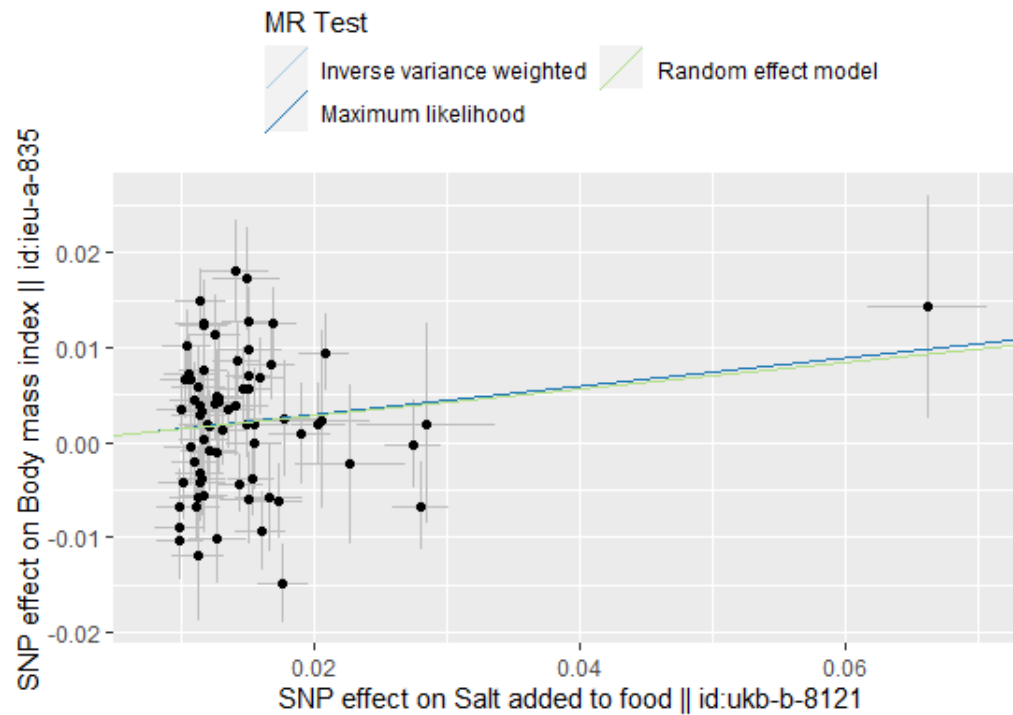

**Figure 2** Funnel plot for the preference of salt added to food on BMI analysis

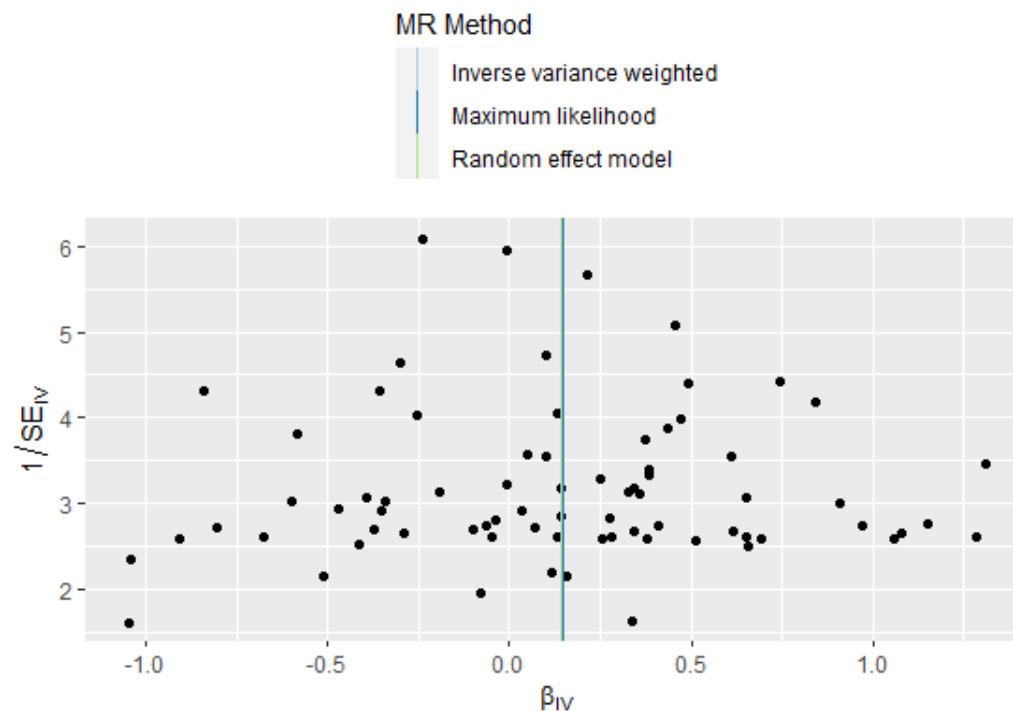

**Figure 3** Forest plot of each SNP estimates and pooled results using different methods

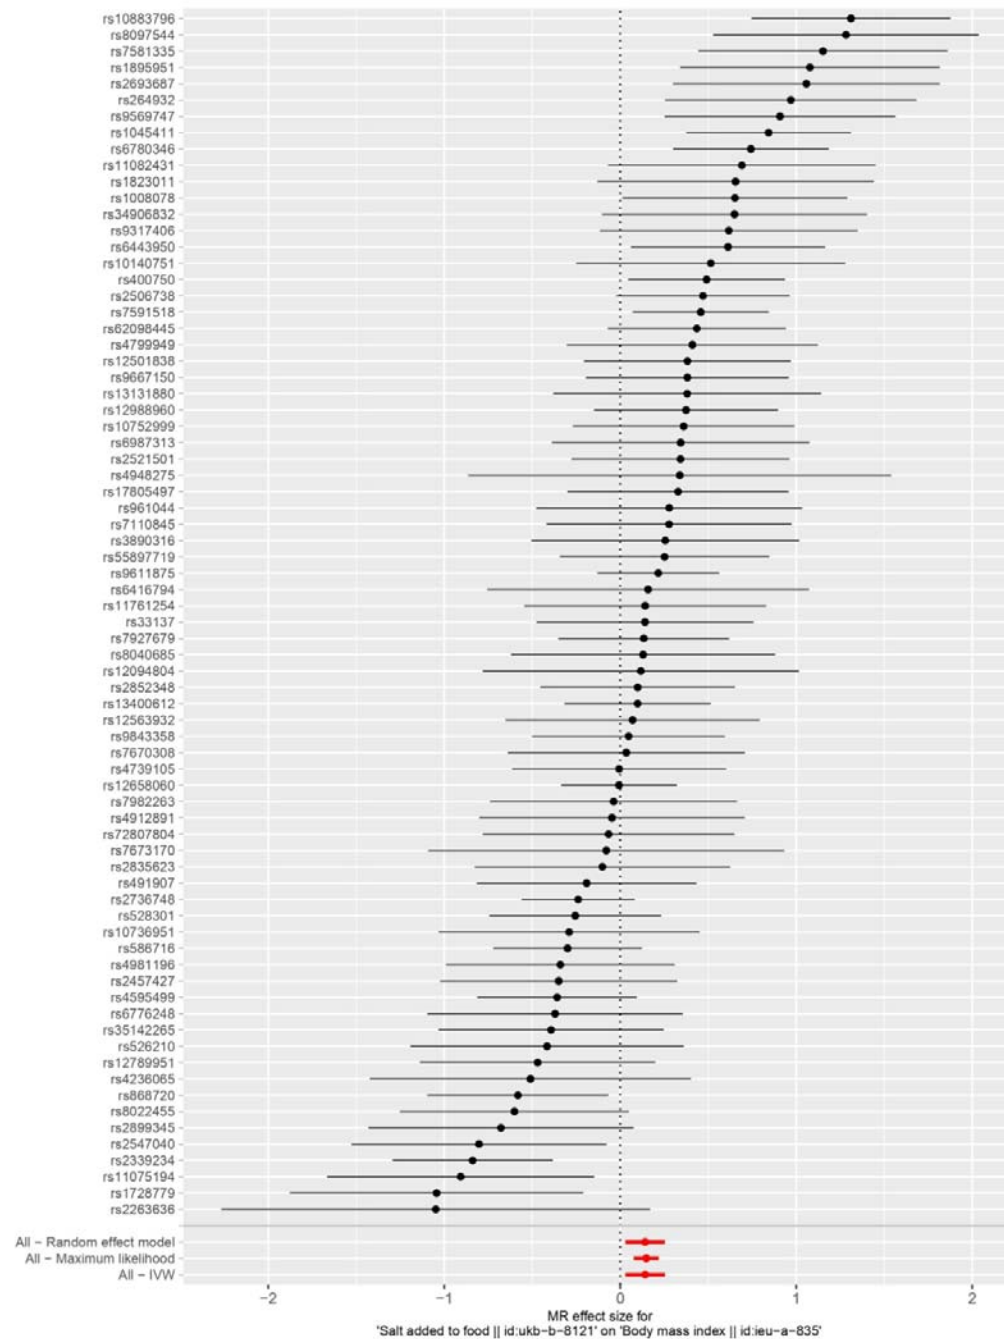

**Figure 4** Forest plot for MR leave-one-out sensitivity analysis

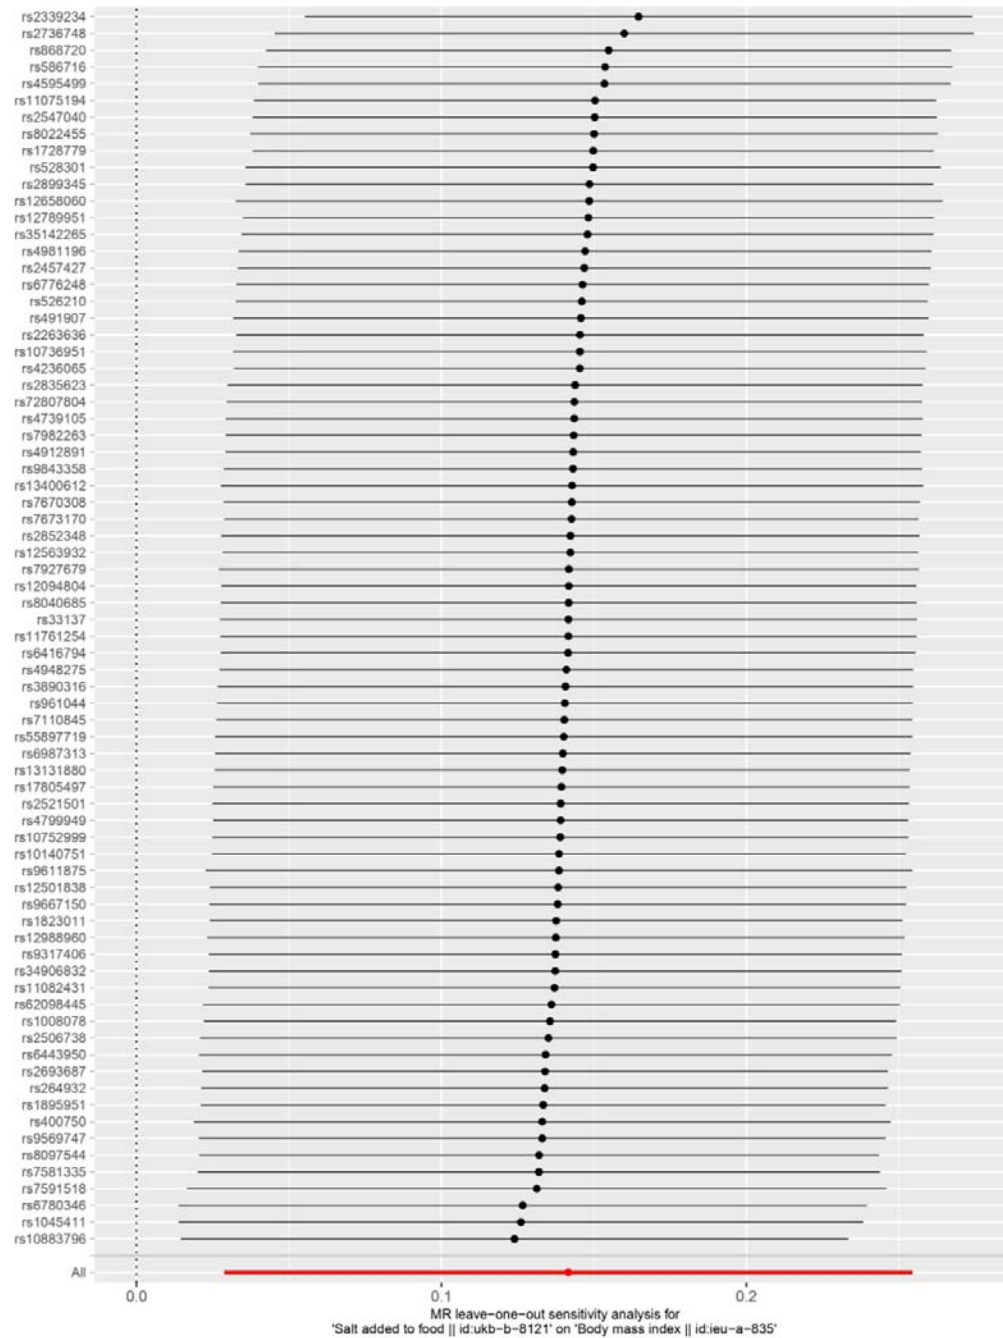

**Figure 5** Forest plot for bidirectional MR analysis with BMI as the exposure and the preference of salt added to food as the outcome

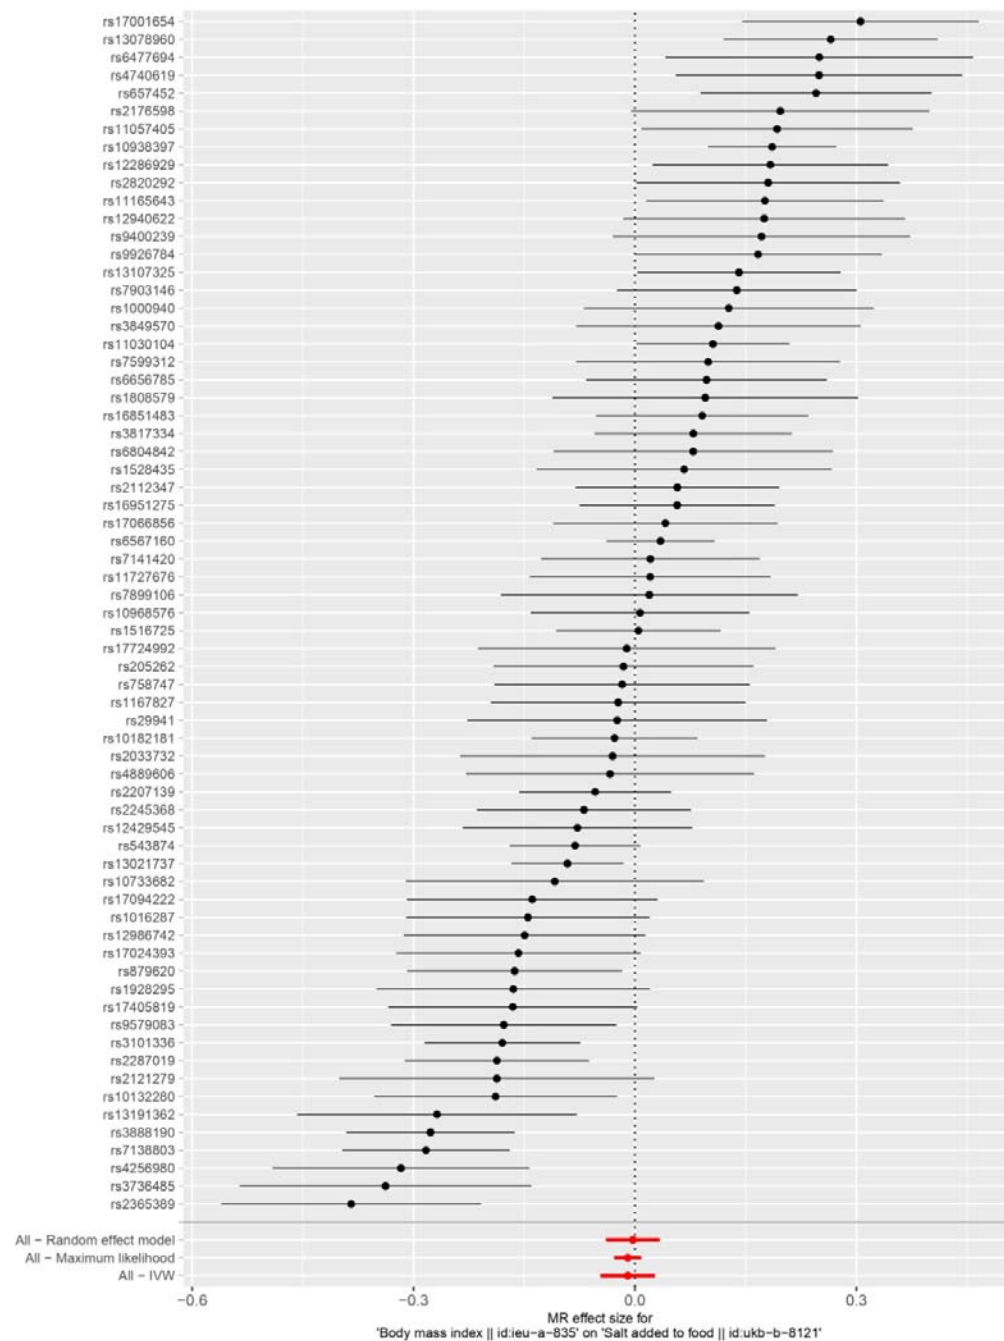

Source: http://medrxiv.org/content/10.1101/2020.06.02.20120097v1.full.pdf
